# Supplementary material for: Structural basis of nucleosome binding and SMARCB1 displacement by SSX1/2 disordered domains
Source: Research Square preprint supplement (doi:10.21203/rs.3.rs-8780462/v1), 2026-02-16
Supplement: Supplementary file 1 [file 26f0f34f89d51873bb3556a3.xlsx]

## Sheet: SI Table S3
Supplementary Talbe S3. Major common and specific interaction sites in SSXRD and SMRACB1.
variant Arg type 1									variant Arg type 2									Arg anchor									Y177
	SMARCB1	R377	-	H2A	E56	vdW/HBOND				SMARCB1	R373	-	H2A	E61	vdW/HBOND/IONIC				SMARCB1	R370	-	H2A	D90	vdW/HBOND				SSX1-class1p3	Y177	L-side	H2A	L65	vdW
				H2A	Y57	vdW							H2A	E64	vdW							H2A	E92	vdW							H2A	A69	vdW
				H2A	A60	vdW																H2B	H106	vdW							H2A	D72	vdW/HBOND
				H2A	E61	HBOND/IONIC																									H2A	L85	vdW
				H2B	V45	vdW				SSX1-class1p3	R171	L-side	H2A	E61	vdW/HBOND																H2A	A86	vdW
				H2B	E110	vdW/HBOND							H2A	E64	vdW/HBOND/IONIC				SSX1-class1p3	R169	L-side	H2A	E61	vdW/HBOND/IONIC							H2A	N89	vdW
												S-side	H2A	E61	vdW/HBOND							H2A	D90	vdW/HBOND/IONIC						S-side	ー	ー	ー
													H2A	E64	vdW/HBOND							H2A	E92	vdW/HBOND
	SSX1-class1p3	W164	L-side	H2A	E56	vdW																H2B	H109	vdW
				H2A	Y57	vdW															S-side	H2A	E61	vdW/HBOND				SSX1-class4	Y177	L-side	ー	ー	ー
				H2B	Q47	vdW/HBOND				SSX1-class4	R171	L-side	H2A	L65	vdW							H2A	D90	vdW/HBOND/IONIC						S-side	ー	ー	ー
			S-side	H2A	E56	vdW							H2A	E61	vdW/HBOND							H2A	E92	vdW/HBOND/IONIC
				H2A	Y57	vdW							H2A	E64	vdW/HBOND							H2B	L106	vdW
				H2B	Q47	vdW/HBOND						S-side	H2A	L65	vdW							H2B	H109	vdW				SSX2-class2	Y177	L-side	H2A	A69	vdW
				H2B	V48	vdW							H2A	E61	vdW/HBOND																H2A	D72	vdW/HBOND
													H2A	E64	vdW/HBOND/IONIC																H2A	N73	vdW
																			SSX1-class4	R169	L-side	H2A	Y57	vdW							H2A	L85	vdW
	SSX1-class4	W164	L-side	H2A	E56	vdW																H2A	E61	vdW/HBOND							H2A	A86	vdW
				H2A	Y57	vdW				SSX2-class2	R171	L-side	H2A	L65	vdW							H2A	D90	vdW/HBOND/IONIC							H2A	N89	vdW
				H2B	Q47	vdW/HBOND							H2A	E61	vdW/HBOND							H2A	E92	vdW/HBOND						S-side	ー	ー	ー
				H2B	V48	vdW							H2A	E64	vdW/HBOND/IONIC							H2A	L93	vdW
			S-side	H2A	E56	vdW						S-side	ー	ー	ー							H2B	L106	vdW
				H2B	Q47	vdW/HBOND																H2B	H109	vdW				SSX2-class3	Y177	L-side	H2A	A69	vdW
				H2B	V48	vdW															S-side	H2A	Y57	vdW							H2A	D72	vdW/HBOND
										SSX2-class3	R171	L-side	H2A	L65	vdW							H2A	E61	vdW/HBOND							H2A	N73	vdW
													H2A	E61	vdW/HBOND							H2A	D90	vdW/HBOND/IONIC							H2A	L85	vdW
	SSX2-class2	W164	L-side	H2A	E56	vdW							H2A	E64	vdW/HBOND							H2A	E92	vdW/HBOND							H2A	N89	vdW
				H2A	Y57	vdW/π-π						S-side	ー	ー	ー							H2B	L106	vdW						S-side	ー	ー	ー
				H2B	Q47	vdW/HBOND																H2B	H109	vdW
				H2A	V48	vdW
				H2B	E113	vdW
			S-side	H2A	E56	vdW													SSX2-class2	R169	L-side	H2A	Y57	vdW
				H2A	Y57	vdW																H2A	E61	vdW/HBOND
				H2B	Q47	HBOND																H2A	D90	vdW/HBOND/IONIC
				H2B	E113	vdW																H2A	E92	vdW/HBOND
																						H2B	E105	vdW
																						H2B	H109	vdW
	SSX2-class3	W164	L-side	H2A	E56	vdW															S-side	H2A	Y57	vdW
				H2A	Y57	vdW																H2A	E61	vdW/HBOND/IONIC
				H2B	Q47	vdW/HBOND																H2A	D90	vdW/HBOND/IONIC
			S-side	H2A	E56	vdW																H2A	E92	vdW/HBOND
				H2A	Y57	vdW																H2B	H109	vdW/π-HBOND
				H2B	Q47	vdW/HBOND
																			SSX2-class3	R169	L-side	H2A	Y57	vdW
																						H2A	E61	vdW/HBOND
																						H2A	D90	vdW/HBOND/IONIC
																						H2A	E92	vdW/HBOND
																						H2B	L106	vdW
																						H2B	H109	vdW
																						H2A	E61	vdW/HBOND
																						H2A	D90	vdW/HBOND/IONIC
																						H2A	E92	vdW/HBOND
																						H2B	L106	vdW
																						H2B	H109	vdW
